# Supplementary material for: Hollow transition metal hydroxide octahedral microcages for single particle surface-enhanced Raman spectroscopy
Source: Royal Society of Chemistry journal article supplement (doi:10.1039/c9qi00579j), 2019-01-01
Supplement: c9qi00579j1.pdf [file c9qi00579j1.pdf]

## Electronic Supplementary Information

### **Hollow transition metal hydroxide octahedral microcages for single particle surface-enhanced Raman spectroscopy**

Mansha Gao,<sup>‡a</sup> Peng Miao,<sup>‡a</sup> Xijiang Han,<sup>\*a</sup> Cheng Sun,<sup>a</sup> Yan Ma,<sup>a</sup> Yali Gao,<sup>a</sup> and Ping Xu<sup>\*a</sup>

<sup>a</sup>. MIIT Key Laboratory of Critical Materials Technology for New Energy Conversion and Storage, School of Chemistry and Chemical Engineering, Harbin Institute of Technology, Harbin 150001, China.

Email: p xu@hit.edu.cn; hanxijiang@hit.edu.cn

<sup>‡</sup>These authors contributed equally.

## Supplementary Figures and Tables

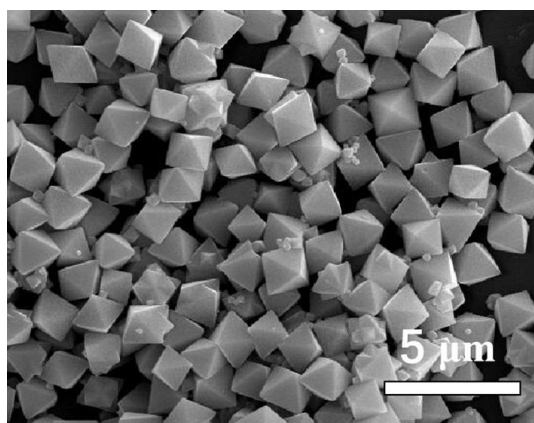

Fig. S1 SEM image of as-prepared precursor  $\text{Cu}_2\text{O}$  octahedron ( $1.5 \mu\text{m}$ ).

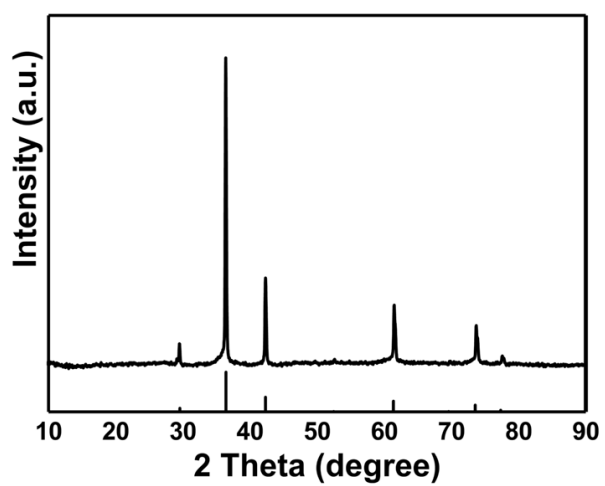

Fig. S2 XRD pattern of as-prepared precursor  $\text{Cu}_2\text{O}$  octahedron ( $1.5 \mu\text{m}$ ).

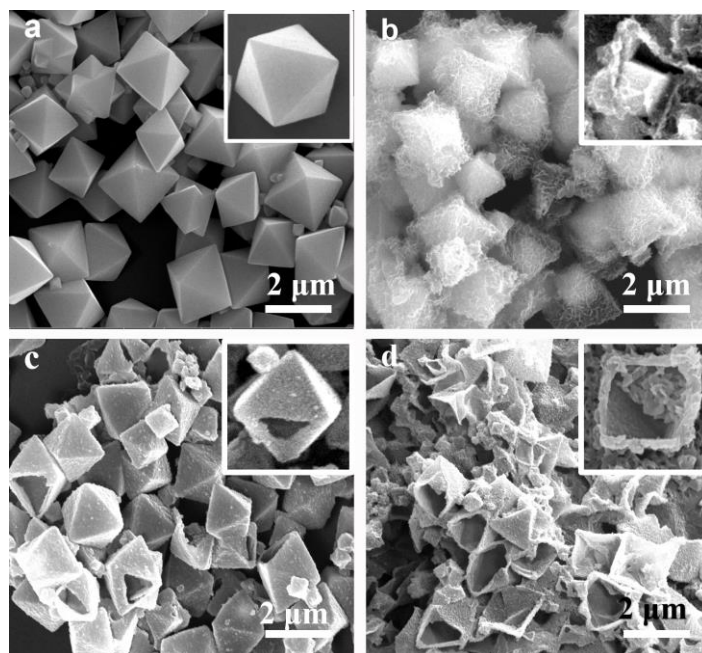

**Fig. S3** SEM images collected at different reaction times: (a) 0 min, (b) 3 min, (c) 6 min, (d) 9 min. It can be clearly observed that the precipitation of transition metal hydroxide is synchronized with the dissolution of  $\text{Cu}_2\text{O}$  from a gappy particle (inset in b). As the reaction proceeds,  $\text{Cu}_2\text{O}$  core gradually disappears and the stacking of hydroxide nanosheets is gradually dense. The whole system is transformed from solid to hollow structure. When the reaction exceeds the optimal time of 9 min, the disappearance of template breaks the balance of the collaborative etching process, and the growth of hydroxides becomes scattered (inset in d).

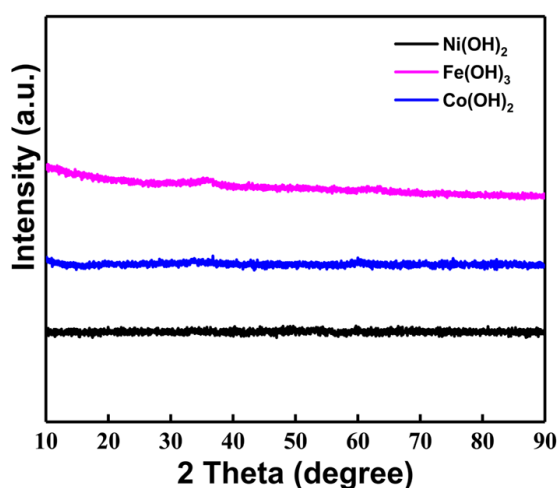

**Fig. S4** XRD pattern of hollow  $\text{M(OH)}_x$  ( $\text{M}=\text{Fe}, \text{Co}, \text{Ni}$ ) octahedral microcages ( $1.5 \mu\text{m}$ ) with  $\text{Cu}_2\text{O}$  as sacrificial templates.

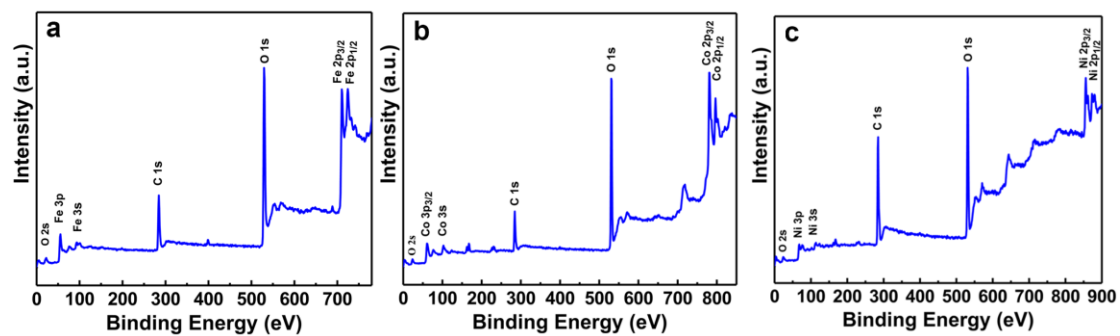

**Fig. S5** Full range XPS spectra of the as-prepared (a) Fe(OH)<sub>3</sub>, (b) Co(OH)<sub>2</sub>, and (c) Ni(OH)<sub>2</sub>.

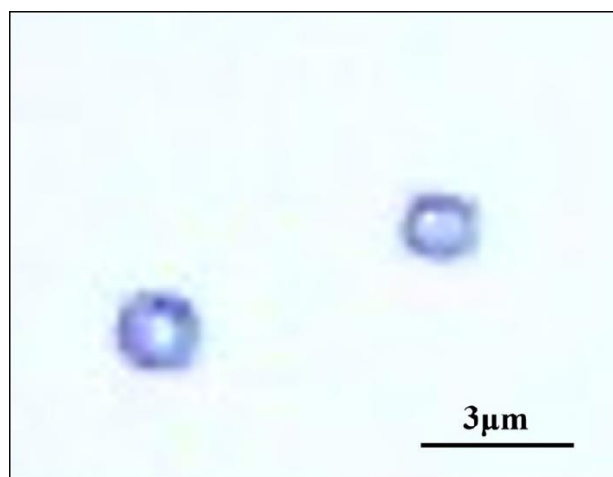

**Fig. S6** Optical image of monodispersed M(OH)<sub>x</sub> micron-octahedron under Renishaw confocal Raman microscope.

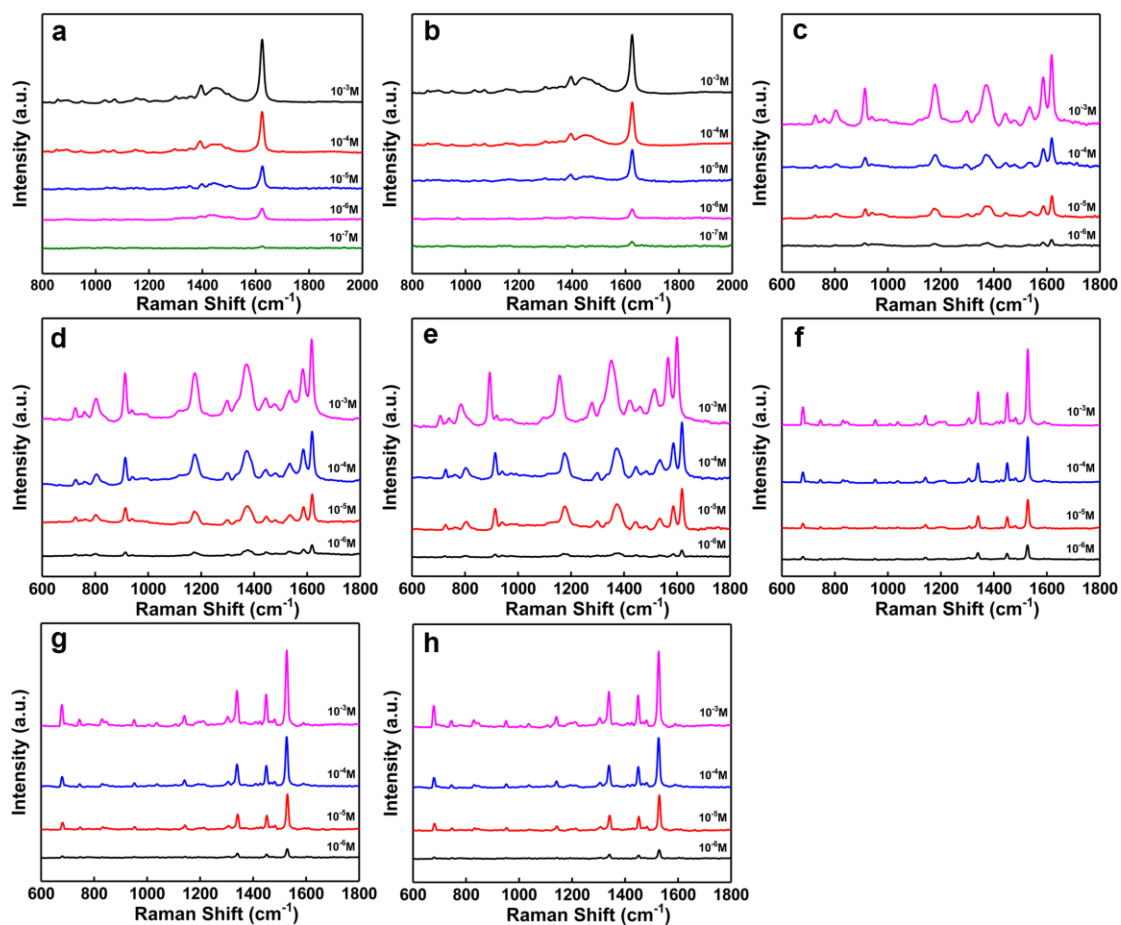

**Fig. S7** Concentration-dependent SERS spectra of MB (b-c), CV (d-f) and CuPc (g-i) on  $\text{Fe}(\text{OH})_3$  (a, c and f),  $\text{Co}(\text{OH})_2$  (b, d and g), and  $\text{Ni}(\text{OH})_2$  (e and h) substrates under 532 nm laser excitation ( $148\mu\text{w}$ ).

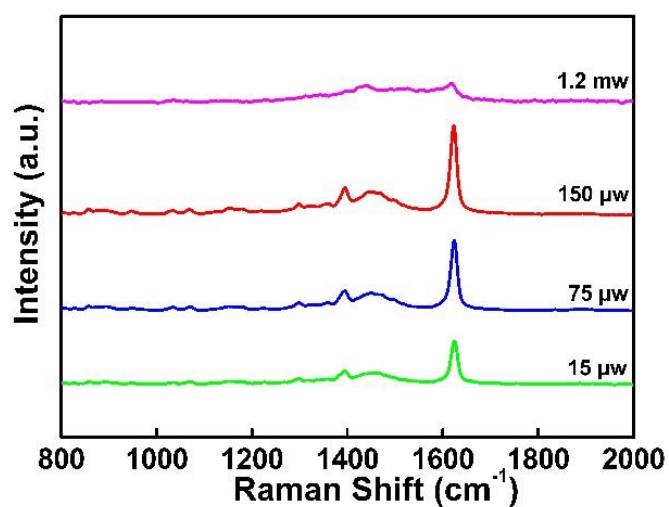

**Fig. S8** Raman spectra of MB ( $10^{-5}$  M) molecules on  $\text{Ni}(\text{OH})_2$  substrates under different laser powers.

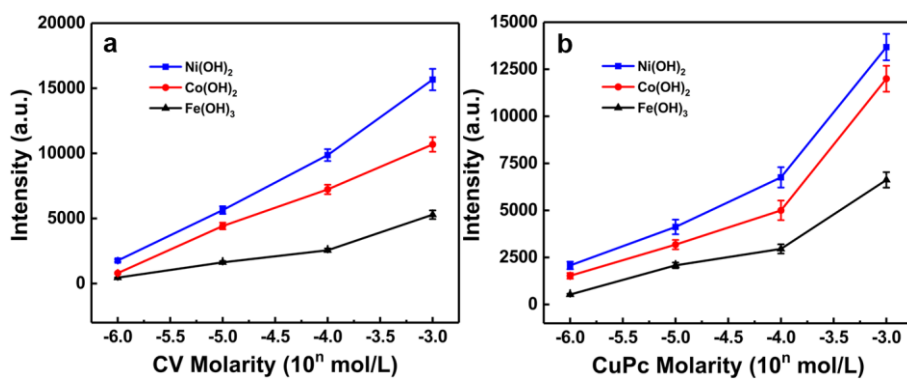

**Fig. S9** (a) The Raman intensity of CV at  $1618\text{ cm}^{-1}$  as a function of the molecular concentration on the  $M(\text{OH})_x$  substrate, (b) The Raman intensity of CuPc at  $1528\text{ cm}^{-1}$  as a function of the molecular concentration on the  $M(\text{OH})_x$  substrate.

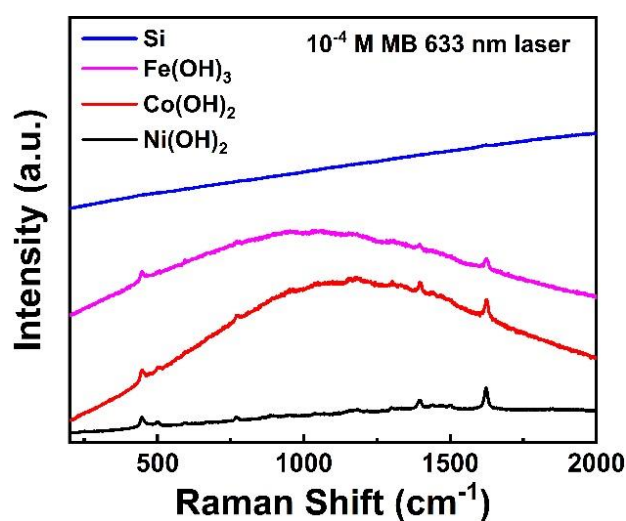

**Fig. S10** Raman spectra of MB ( $10^{-4}$  M) molecules on three substrates collected with 633 nm laser.

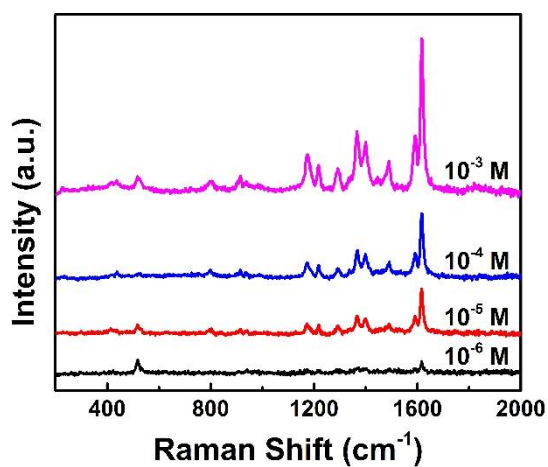

**Fig. S11** Concentration-dependent SERS spectra of malachite green dye on the  $\text{Ni}(\text{OH})_2$  substrate collected with 532 nm laser.

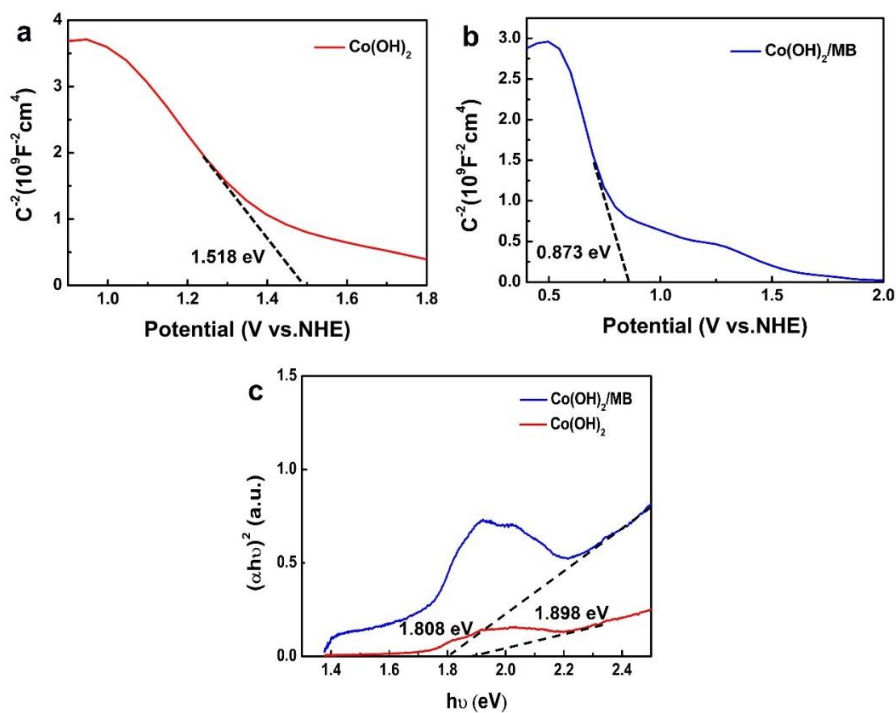

**Fig. S12** Electrochemical Mott–Schottky (M–S) plots of  $\text{Co(OH)}_2$  (a) and  $\text{Co(OH)}_2/\text{MB}$  (b). (c) Tauc plot of  $\text{Co(OH)}_2$  before and after MB adsorption.

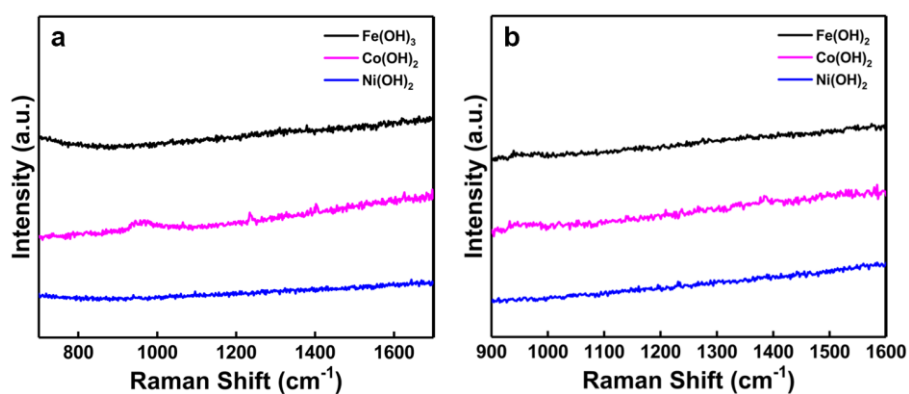

**Fig. S13** SERS spectra of pyrene (a) and benzopyrene (b) on  $\text{M(OH)}_x$  ( $\text{M}=\text{Fe}, \text{Co}, \text{Ni}$ ) substrates at 532 nm laser excitation.

**Table S1.** Enhancement factor of some SERS-active metal hydroxides and metal oxides based on charge transfer mechanism.

| Material(s)                     | Morphology       | Probes | EF              | Ref.      |
|---------------------------------|------------------|--------|-----------------|-----------|
| TiO <sub>2</sub>                | 10 nm particle   | 4-MBA  | 10 <sup>3</sup> | 1         |
| ZnO                             | nanocage         | 4-MBA  | 10 <sup>5</sup> | 2         |
| Fe <sub>2</sub> O <sub>3</sub>  | sphere           | 4-MBY  | 10 <sup>4</sup> | 3         |
| CuO                             | nanocrystals     | 4-MBY  | 10 <sup>2</sup> | 4         |
| W <sub>18</sub> O <sub>49</sub> | nanowire         | R6G    | 10 <sup>5</sup> | 5         |
| Co(OH) <sub>2</sub>             | nanosheet        | DTTCI  | 10 <sup>3</sup> | 6         |
| Ni(OH) <sub>2</sub>             | Hollow octahedra | MB     | 10 <sup>3</sup> | This work |

**Table S2.** Deviation of binding energy after adsorption of MB molecule on different transition metal hydroxides substrate

| Sample                  | N 1 s binding energy (eV) |         |
|-------------------------|---------------------------|---------|
|                         | Peak I                    | Peak II |
| Fe(OH) <sub>3</sub> /MB | 399.7                     | 400.7   |
| Co(OH) <sub>2</sub> /MB | 399.8                     | 400.8   |
| Ni(OH) <sub>2</sub> /MB | 399.7                     | 401.9   |



**Table S3.** The Binding Energy of metal ions before and after adsorption of MB molecule

| Metal ion                                        | Fe <sup>3+</sup>  |                   | Co <sup>2+</sup>  |                   | Ni <sup>2+</sup>  |                   |
|--------------------------------------------------|-------------------|-------------------|-------------------|-------------------|-------------------|-------------------|
| Orbital split                                    | 2P <sub>1/2</sub> | 2P <sub>3/2</sub> | 2P <sub>1/2</sub> | 2P <sub>3/2</sub> | 2P <sub>1/2</sub> | 2P <sub>3/2</sub> |
| Binding energy before absorbing MB (eV)          | 724.6 eV          | 711.0 eV          | 796.8 eV          | 781.0 eV          | 873.7 eV          | 855.7 eV          |
| Binding energy after absorbing MB (eV)           | 725.2 eV          | 711.6 eV          | 797.4 eV          | 781.6 eV          | 874.2 eV          | 856.2 eV          |
| The shift amount of binding energy $\Delta$ (eV) | 0.6 eV            |                   | 0.6 eV            |                   | 0.5 eV            |                   |

## Calculation of enhancement factor.

The enhancement factor was calculated according to the following equation (Angew. Chem. Int. Ed. 2017, 56, 9851 – 9855):

$$EF = (I_{SERS} / N_{SERS}) / (I_{NR} / N_{NR})$$

where  $I_{SERS}$  and  $I_{NR}$  are the Raman intensities of MB molecule on  $M(OH)_x$  substrate and that without substrate (Si substrate in this study).  $N_{SERS}$  is the number of molecules adsorbed on the  $M(OH)_x$  substrate within the laser spot area, and  $N_{NR}$  stands for the number of molecules excited on the Si substrate. In order to obtain the value of  $N_{NR}$ , 100  $\mu\text{L}$  of MB solution (1 mM) was dropped onto the Si wafer ( $0.5 \times 0.5 \text{ cm}^2$ ).  $N_{NR}$  can be estimated by the following equation:

$$N_{NR} = c_{NR} V (A_{\text{beam}}/A) N_A$$

where  $A_{\text{beam}} = \pi(d/2)^2$  is the area of the focal spot of the laser,  $d$  is the diameter of the light spot estimated by  $d = 1.22 \lambda/\text{NA}$ ,  $\lambda$  is the incident laser wavelength, i.e., 532 nm, and the numerical aperture (NA) of the objective lens  $\text{NA} = 0.75$ . Thereby, laser spot size is approximately  $1.87 \mu\text{m}^2$ .  $A$  is the area of MB molecule layer which equal to the area of Si wafer ( $0.25 \text{ cm}^2$ ).  $N_A$  stands for Avogadro's constant. Therefore,  $N_{NR}$  equals to:

$$N_{NR} = 40 \mu\text{L} \times 0.001 \text{ mol} / \text{L} \times 0.59 \mu\text{m}^2 / 0.25 \text{ cm}^2 \times 6.02 \times 10^{23} \text{ mol}^{-1} = 5.68 \times 10^8$$

Moreover,  $N_{SERS}$  is the number of adsorbed molecules scattered in the area of laser beam, which can be estimated by the following equation:

$$N_{SERS} = A_{\text{beam}}/\sigma$$

where  $\sigma$  is the area occupied by a molecule of adsorbent at monolayer coverage, which is estimated to  $\sim 0.5 \text{ nm}^2$ . It should be mentioned that the surface coverage must remain smaller than one monolayer when using this equation. The concentration of the MB solution was controlled lower than  $1 \times 10^{-4} \text{ M}$  to prevent the supersaturation adsorption of probe molecule onto  $M(OH)_x$  substrate.  $N_{SERS}$  is calculated to be  $1.18 \times 10^6$ . The intensity at  $1626 \text{ cm}^{-1}$  of MB molecule on Si and the intensity at  $1624 \text{ cm}^{-1}$  on  $\text{Ni(OH)}_2$  substrate were used to calculate EF values. Here  $I_{SERS} = 27000$ , and  $I_{NR} = 5530$  (Fig. S14). By substituting these values into the equation, EF is calculated to be  $2.35 \times 10^3$ .

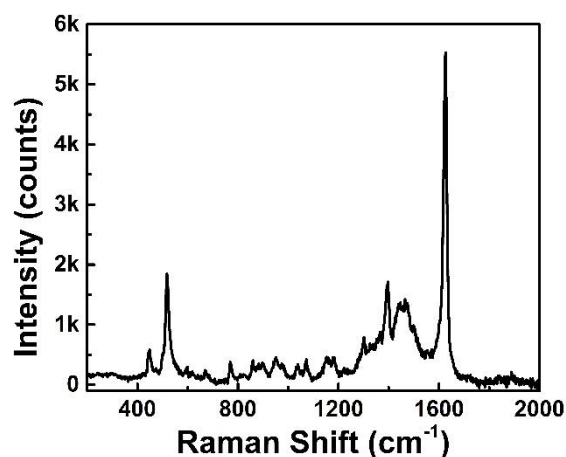

**Fig. S14** The normal Raman spectrum of pure MB (1 mM) on Si substrate.

## References:

1. L. B. Yang, X. Jiang, W. D. Ruan, B. Zhao, W. Q. Xu and J. R. Lombardi, *J. Phys. Chem. C*, 2008, 112, 20095–20098.
2. X. Wang, W. Shi, Z. Jin, W. Huang, J. Lin, G. Ma, S. Li and L. Guo, *Angew. Chem., Int. Ed.*, 2017, 56, 9851-9855.
3. X. Q. Fu, F. L. Bei, X. Wang, X. J. Yang and L. D. Lu, *J. Raman Spectrosc.*, 2009, 40, 1290–1295.
4. Y. Wang, H. Hu, S. Jing, Y. Wang, Z. Sun, B. Zhao, C. Zhao and J. R. Lombardi, *Anal. Sci.*, 2007, 23, 787–791.
5. S. Cong, Y. Yuan, Z. Chen, J. Hou, M. Yang, Y. Su, Y. Zhang, L. Li, Q. Li, F. Geng and Z. Zhao, *Nat. Commun.*, 2015, 6, 7800.
6. Q. Zhao, G. Liu, H. Zhang, Y. Li and W. Cai, *Adv. Mater. Interfaces*, 2018, 5, 1700709.
